# Supplementary material for: The past, present and future distribution of a deep-sea shrimp in the Southern Ocean
Source: PubMed Central journal article supplement (PMC4768674; doi:10.7717/peerj.1713), 2016-02-23

**A**

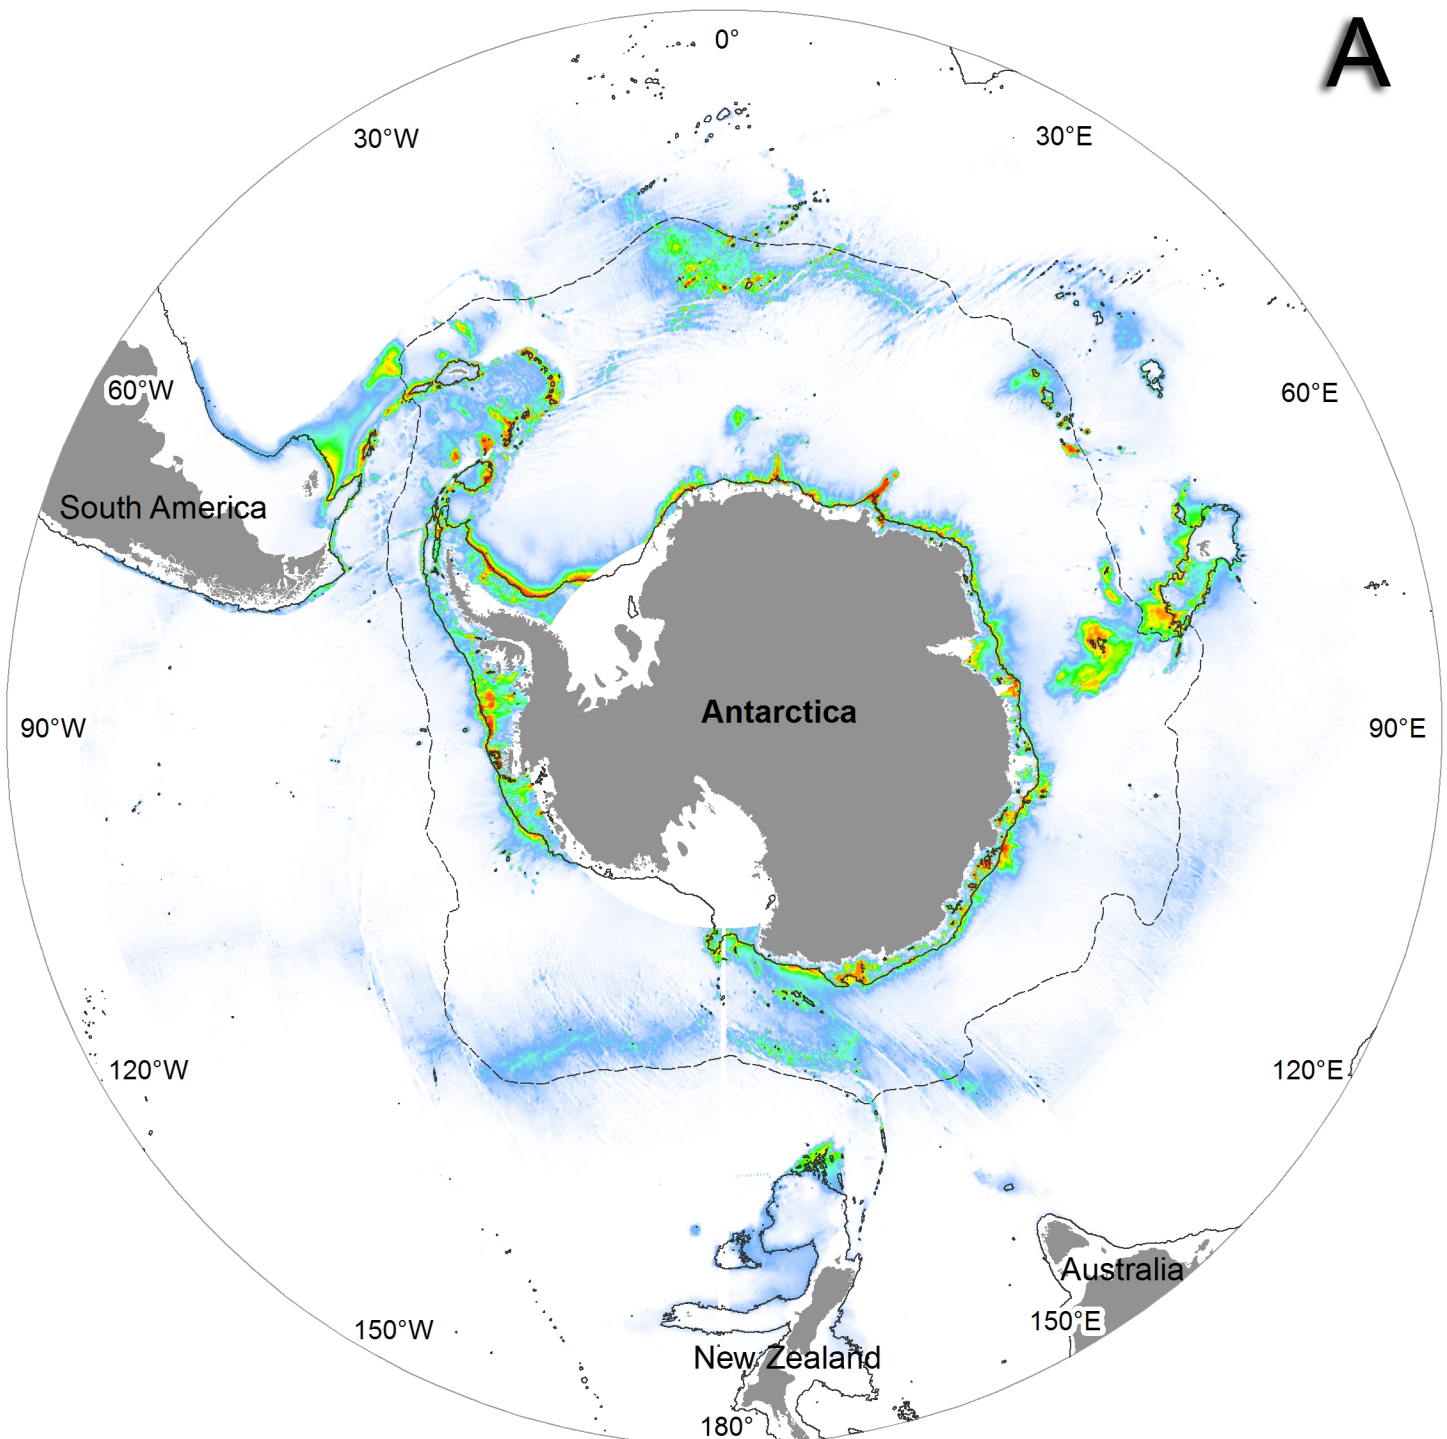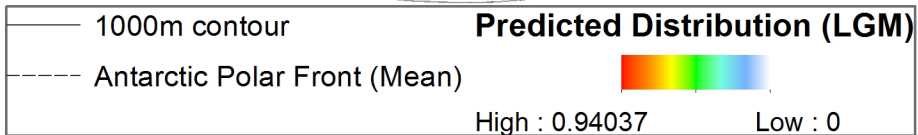

**B**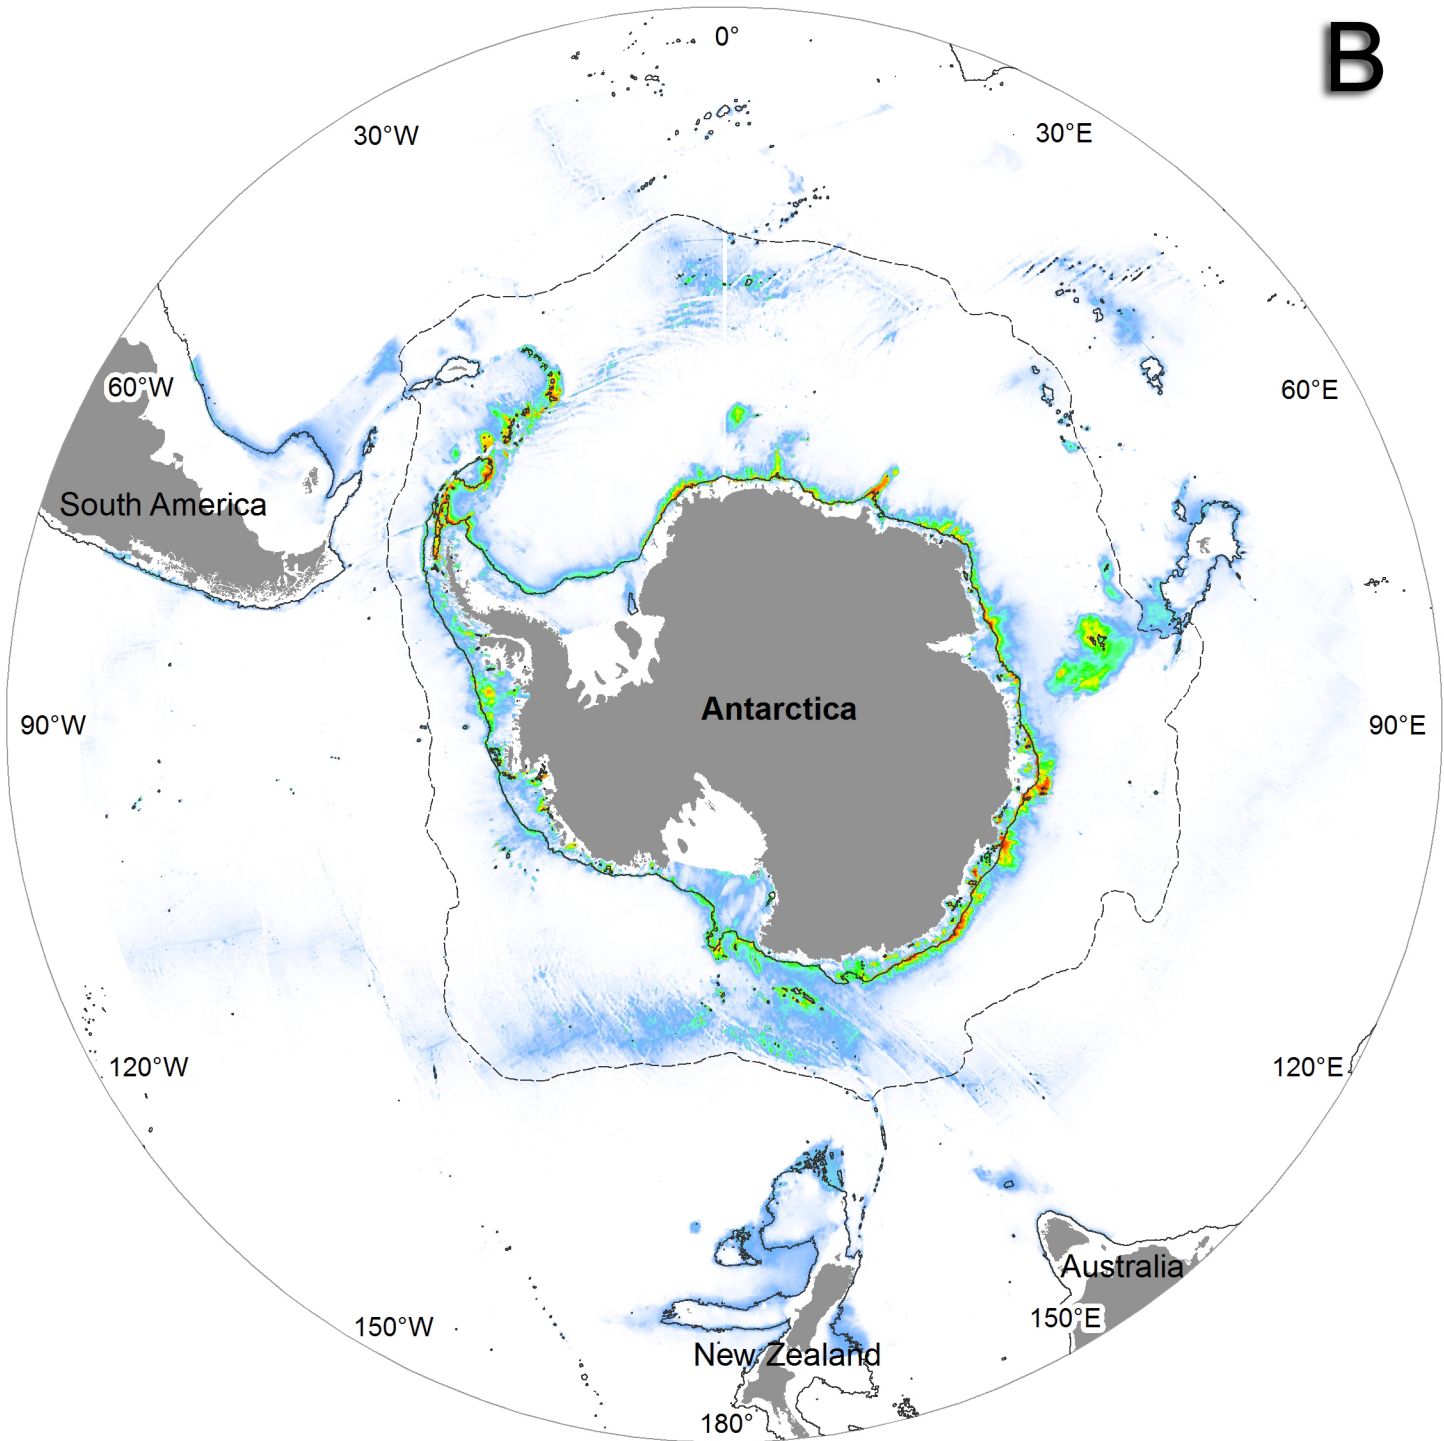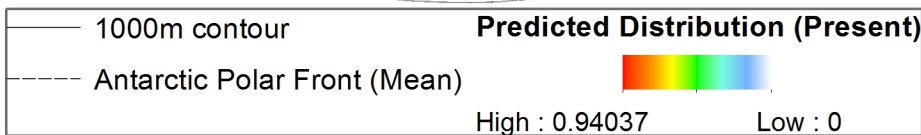

**C**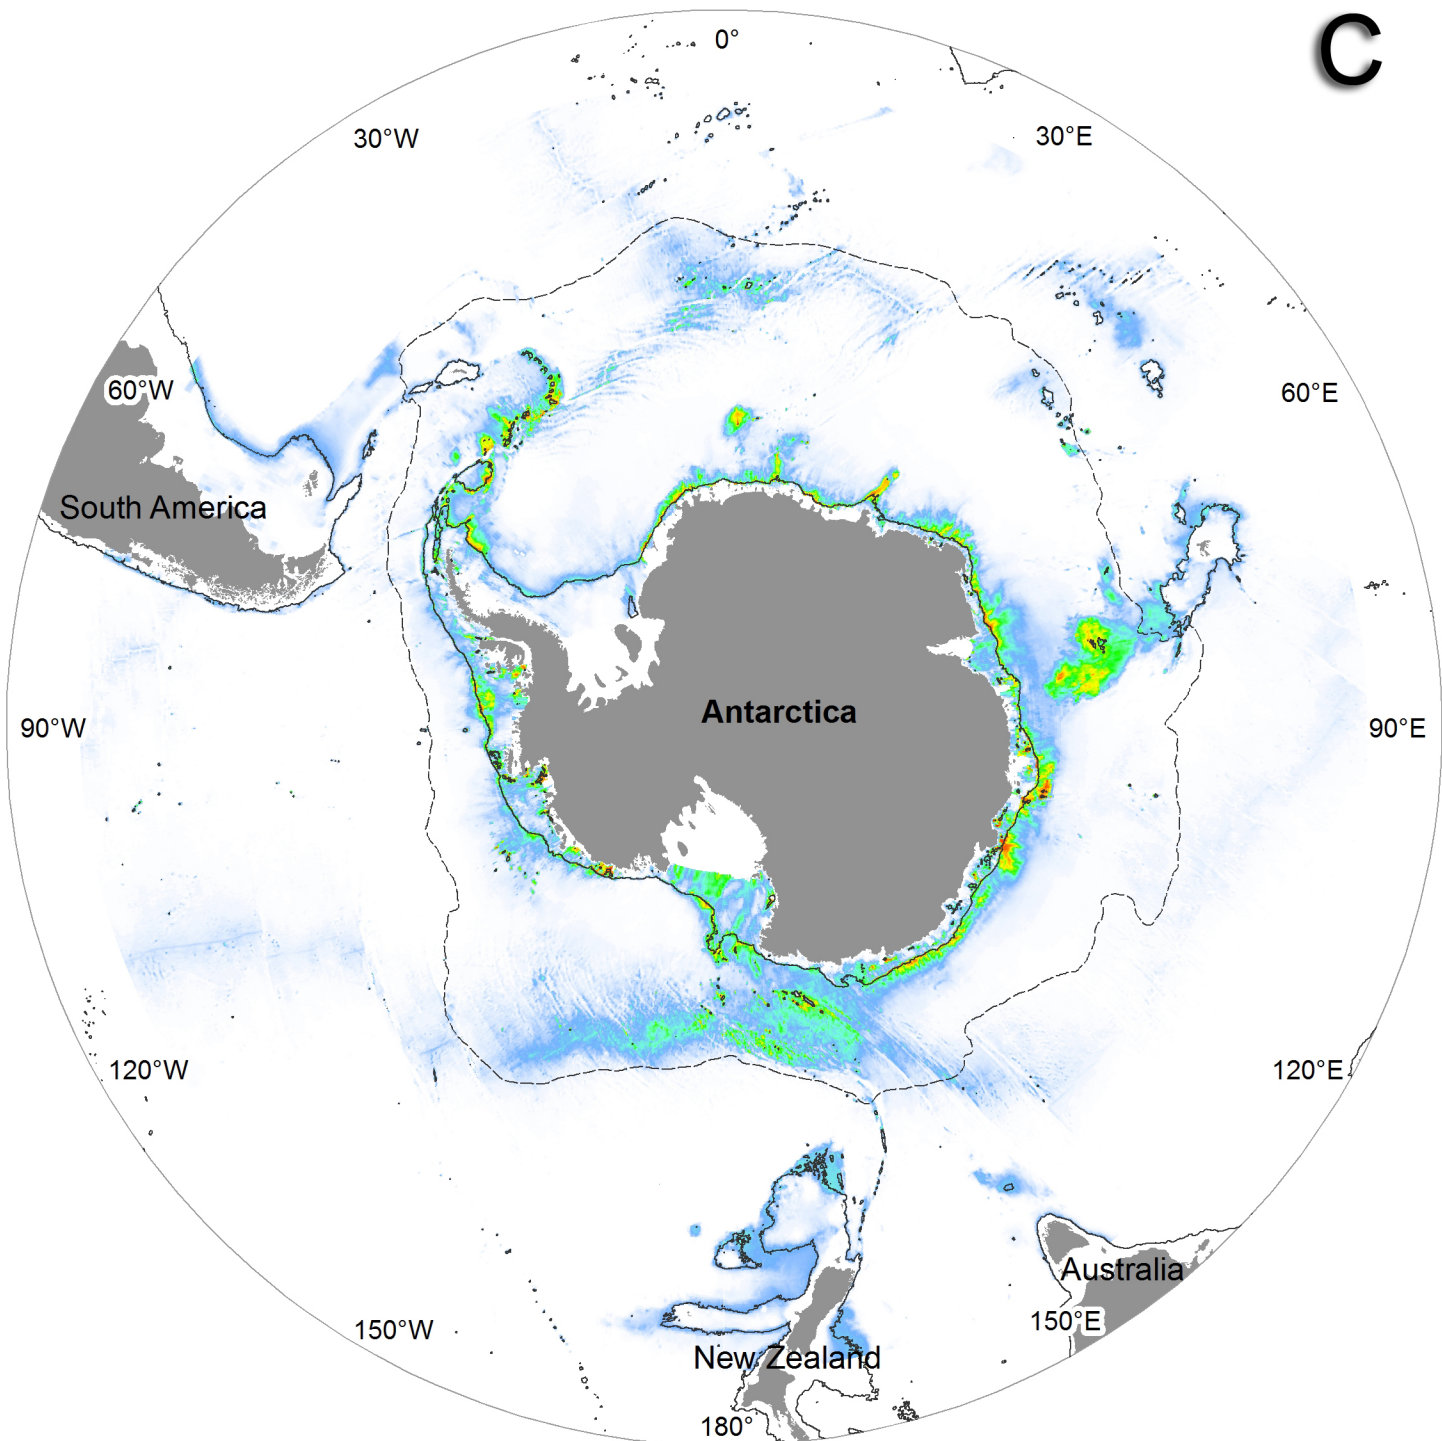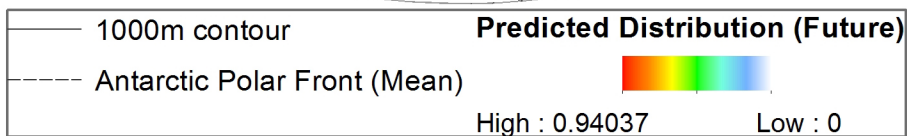

Supplement: peerj-04-1713-s004.pdf [file peerj-04-1713-s004.pdf]
